# Supplementary material for: Size-dependent functional response of Xenopus laevis feeding on mosquito larvae
Source: PeerJ. 2018 Oct 26;6:e5813. doi: 10.7717/peerj.5813 (PMC6204824; doi:10.7717/peerj.5813)
Supplement: Supplemental Information 1 — Columns describe 1. Predator size. 2. The density of prey used. 3. The total number of prey that survived after the experiment was completed. 4. The total number of prey eaten over the duration of the entire experiment. [file peerj-06-5813-s001.csv]

Predator size	density	alive	eaten
Large	20	20	0
Large	50	42	8
Large	100	68	32
Large	500	292	208
Large	200	131	69
Large	100	74	26
Large	50	50	0
Large	500	318	182
Large	200	155	45
Large	20	20	0
Large	20	8	12
Large	100	58	42
Large	500	302	198
Large	500	296	204
Large	50	47	3
Large	200	120	80
Large	200	25	175
Large	100	61	39
Large	50	4	46
Large	20	20	0
Medium	20	2	18
Medium	500	155	345
Medium	50	43	7
Medium	500	308	192
Medium	200	50	150
Medium	200	130	70
Medium	50	50	0
Medium	100	32	68
Medium	100	37	63
Medium	20	7	13
Medium	20	11	9
Medium	100	47	53
Medium	200	29	171
Medium	100	80	20
Medium	200	70	130
Medium	500	61	439
Medium	500	180	320
Medium	50	2	48
Medium	50	3	47
Medium	20	7	13
Small	100	5	95
Small	20	6	14
Small	20	1	19
Small	50	2	48
Small	50	3	47
Small	200	19	181
Small	200	50	150
Small	50	11	39
Small	20	5	15
Small	200	68	132
Small	100	12	88
Small	500	356	144
Small	500	363	137
Small	100	11	89
Small	100	38	62
Small	500	400	100
Small	500	340	160
Small	50	2	48
Small	200	36	164
Small	20	1	19
